# Supplementary material for: Combining same-target drugs exhibits additive efficacy with minimal toxicity
Source: Research Square preprint supplement (doi:10.21203/rs.3.rs-4822017/v1), 2024-09-04
Supplement: Supplementary file 1 [file 2421758a445f83c0c6e6f93d.docx]

**SI Guide** for

Combining same-target drugs exhibits additive efficacy with minimal toxicity

**1. Supplementary Note (Sections 1.1**–**1.3.7)**

**2. Supplementary Discussion (Section 2.1**–**2.4.2)**

**3. Supplementary Figs. 1 and 2**

**4. Supplementary Tables 1 to 17**

**5. Supplementary References (67**–**136)**

**1. Supplementary Note**

**1.1 Supplementary evidence for the additive effects** **of DNA TOPO II inhibitors**

**1.1.1 Animal experiments**

1.1.1.1 Survival details in the 8-drug ascites tumor study

1.1.1.2 TIR in 4-drug solid tumor study

1.1.2 Cell experiments

1.1.2.1 Additive effects of four inhibitors on HepG2 cells

1.1.2.2 The additive effects of the six-inhibitor combination on HepG2 cells

1.1.2.3 Antitumor activity of combinations with different numbers of inhibitors at the same inhibition rates in HepG2 cells

1.1.2.4 The additive effects of six inhibitors on U87, HL-60, BxPC-3, and Hela cells

1.1.2.5 Dose-response curves and calculation of the combination index

**1.1.3** **Enzyme experiments**

1.1.3.1 TOPO II-mediated kDNA decatenation assay

1.1.3.2 TOPO II-mediated DNA uncoiling assay

**1.2 Supplementary evidence for the reduced toxicity of the 8-drug combination in** **the 8-drug solid tumor study**

1.2.1 Hepatotoxicity

1.2.2 Cardiotoxicity

1.2.3 Physical condition

1.2.4 Growth status and adverse gastrointestinal effects

1.2.5 Myelosuppression

1.2.6 Immune system damage

**1.3 Toxicities of four drugs alone or in combination** **in solid tumour mouse model**

1.3.1 Survival rate

1.3.2 Hepatotoxicity

1.3.3 Cardiotoxicity

1.3.4 Nephrotoxicity

1.3.5 Immune system damage

1.3.6 Growth status and adverse gastrointestinal effects

1.3.7 Comparison of toxicities in the 4-drug-Cdg and the single-drug groups in the 8-drug solid tumour study

**2. Supplementary** **Discussion**

**2.1 Does the observed toxicity reduction of the 8-drug-Cdg in this study hold significant clinical implications？**-----Comparison of the toxicities of the 8-drug-Cdg with the clinical toxicities of the eight anticancer drugs

**2.2 Why and how is the ‘toxicity scattering effect’ elicited? Do drugs with different structures that produce distinct toxicity profiles underlie the ‘toxicity scattering effect’ resulting in significantly reduced toxicity when combining multiple drugs with the same target?** -----Relationship between chemical structures and toxicities of drugs and the ‘toxicity scattering effect’

**2.2.1 The relationship between the chemical structures and toxicities of the eight drugs in the present study**

**2.2.2 Relationship between chemical structures and toxicities of drugs reported in the literature**

2.2.2.1 Different toxicities of doxorubicin and pirarubicin

2.2.2.2 Different toxicities of doxorubicin and idarubicin

2.2.2.3 Different toxicities of doxorubicin and epirubicin

2.2.2.4 Different toxicities of etoposide and teniposide

2.2.2.5 Different toxicities of the eight drugs in animal experiments in the present study

**2.2.3 Conclusion for the relationship between the chemical structures and toxicities of drugs and the ‘toxicity scattering effect’**

**2.3 Why is the anticancer efficacy additive, but the toxicity is not additive? Why do low doses of the 8 drugs have additive effects on cancer cells but not on normal cells?**

**2.4** **Does combining more drugs with the same target lower the required** **dose of each drug and increase the likelihood of the ‘toxicity scattering effect’?**

2.4.1 Impact of the number of the same-target drugs in combination on toxicity in the present study

2.4.2 The reason most traditional Chinese medicines (TCMs) have very low toxicity or are non-toxic is that a certain group of active substances of a single TCMs is equivalent to a combination of numerous constituents that collectively act on the same target.

**3. Supplementary Figs. 1 and 2**

**Supplementary Fig. 1.** The chemical structures of the 11 anticancer drugs used in this study. All drugs target DNA topoisomerase II

**Supplementary Fig. 2.** Dose-response curves of seven TOPO II inhibitors in U87 (a), HL-60 (b), BxPC-3 (c), Hela (d), and HepG2 (e) cells

**4. Supplementary Tables 1****–17**

**Supplementary Table 1.** Common toxicities of the TOPO II inhibitors according to the human organs affected

**Supplementary Table 2.** Drug toxicities in animal models

**Supplementary Table 3.** LD50 in mice for [intraperitoneal injection](https://www.baidu.com/link?url=eYtaP9W_H7IyDTkJhSauvPYyCZT9SioXqOMYuHhZGnYsEsFgnUyCEAoXw6TtHm6PEmLgNCIXUr7ZxRX0vvrLdwwRMAZGmWQn7FkBwU2mctHVaqpr7N0cqhOs-IQU5neQ&wd=&eqid=f31bb52200019183000000035a4a471d)s of the 8 drugs

**Supplementary Table 4.** Literature report of ineffective, effective, or usual doses of 8 anticancer drugs in different mice

**Supplementary Table 5.** Concentrations of the six inhibitors in the additive experiment in Hep G2 cells

**Supplementary Table 6.** Concentrations of the six inhibitors in the additive experiment in U87, HL-60, BxPC-3, and Hela cell lines

**Supplementary Table 7.** IC50 values for the seven TOPO II inhibitors in the five cell lines

**Supplementary Table 8.** Concentrations of the four inhibitors with similar IC50 values in the additive experiment in HepG2 cells

**Supplementary Table 9.** Concentrations of the four inhibitors with large IC50 differences in the additive experiment in HepG2 cells

**Supplementary Table 10.** Proportionally reduced concentrations of combined inhibitors in HepG2 cell proliferation experiments

**Supplementary Table 11.** Comparison of antitumor activity (inhibition rates) among combination groups composed of different inhibitors or different numbers of inhibitors in HepG2 cells

**Supplementary Table 12.** TOPO II assay treatment doses

**Supplementary Table 13.** Gray values (GV) for TOPO II-mediated kDNA decatenation

**Supplementary Table 14.** Gray values (GV) for TOPO II-mediated DNA uncoiling assay

**Supplementary Table 15.** Comparison of experimental doses for each drug in 8-drug-Cdg used in the solid tumour mouse model with clinical doses

**Supplementary Table 16.** Comparison of experimental doses for 8 Sdgs in the solid tumour mouse model with clinical doses

**Supplementary Table 17.** Combination index (CI) for U87 cell experiment for combinations of six TOPO II inhibitors

**5. Supplementary References** **(67**–**136)**
